# Supplementary material for: Himalayan Saccharomyces eubayanus Genome Sequences Reveal Genetic Markers Explaining Heterotic Maltotriose Consumption by Saccharomyces pastorianus Hybrids
Source: PubMed Central journal article supplement (PMC6821976; doi:10.1128/aem.01516-19), 2019-10-30
Supplement: AEM.01516-19-s0001.pdf [file AEM.01516-19-s0001.pdf]

## Supplementary Tables and Figures

The genome sequences of Himalayan *Saccharomyces eubayanus* revealed genetic markers explaining heterotic maltotriose consumption by hybrid *Saccharomyces pastorianus*.

Heterotic origin of maltotriose consumption in *Saccharomyces pastorianus*

Nick Brouwers<sup>a</sup>, Anja Brickwedde<sup>a</sup>, Arthur R. Gorter de Vries<sup>a</sup>, Marcel van den Broek<sup>a</sup>, Susan M. Weening<sup>a</sup>, Lieke van den Eijnden<sup>a</sup>, Jasper A. Diderich<sup>a</sup>, Feng-Yan Bai<sup>b</sup>, Jack T. Pronk<sup>a</sup> and Jean-Marc G. Daran<sup>a\*</sup>

<sup>a</sup>Department of Biotechnology, Delft University of Technology, Van der Maasweg 9, 2629 HZ Delft, The Netherlands.

<sup>b</sup>State Key Laboratory of Mycology, Institute of Microbiology, Chinese Academy of Sciences, Beijing, 100101, China.

\* Corresponding author: Jean-Marc G. Daran, j.g.daran@tudelft.nl, Department of Biotechnology, Delft University of Technology, van der Maasweg 9, 2629 HZ Delft, The Netherlands

**Supplementary Table 2:** Statistical significance assessment (<sup>student t-test</sup> p<sub>value</sub>) of Expression levels of maltose metabolism genes in *S. eubayanus* IMX1765 (MAT $\alpha$ /MAT $\alpha$  Sesga1 $\Delta$ ::ScMAL13 / Sesga1 $\Delta$ ::ScMAL13) mid-exponential phase grown cells on glucose, maltose and maltotriose (Figure 6). p-values were determined using Student's t-test.

| <sup>t-test</sup> p <sub>value</sub> | Glc vs Mal | Glc vs Mtt | Mal vs Mtt |
|--------------------------------------|------------|------------|------------|
| <i>SeMALT1</i>                       | 2.85E-03   | 5.18E-04   | 1.11E-02   |
| <i>SeMALT2</i>                       | 7.49E-02   | 4.01E-02   | 2.27E-01   |
| <i>SeMALT3</i>                       | 3.38E-05   | 7.22E-03   | 1.29E-01   |
| <i>SeAGT1</i>                        | 1.54E-04   | 4.91E-04   | 3.23E-01   |
| <i>SeMALS1</i>                       | 1.68E-03   | 6.37E-04   | 5.47E-03   |
| <i>SeMALS2</i>                       | 1.75E-03   | 3.42E-03   | 5.25E-03   |
| <i>SeMALR1</i>                       | 2.90E-02   | 1.92E-02   | 2.17E-01   |
| <i>SeMALR2</i>                       | 5.90E-03   | 8.17E-04   | 3.64E-02   |
| <i>SeMALR3</i>                       | 2.81E-03   | 3.36E-03   | 1.54E-01   |
| <i>ScMAL13</i>                       | 8.24E-01   | 3.94E-01   | 7.53E-01   |

**Supplementary Table 3:** Statistical significance assessment (<sup>student t-test</sup> p<sub>value</sub>) of expression levels of maltose metabolism genes in interspecific hybrid (Sc X Se) HTS020 mid-exponential phase grown cells on glucose, maltose and maltotriose (Figure 7). p-values were determined using Student's t-test.

|                | Glc vs Mal | Glc vs Mtt | Mal vs Mtt |
|----------------|------------|------------|------------|
| <i>ScMALR3</i> | 4.62E-01   | 1.35E-01   | 9.40E-02   |
| <i>ScMALR2</i> | 1.20E-02   | 5.14E-02   | 2.36E-03   |
| <i>ScMALR1</i> | 2.05E-03   | 2.32E-03   | 1.66E-01   |
| <i>SeMALR3</i> | 3.87E-04   | 2.00E-04   | 1.78E-03   |
| <i>SeMALR2</i> | 1.35E-01   | 1.61E-02   | 2.12E-01   |
| <i>SeMALR1</i> | 3.86E-03   | 4.39E-03   | 3.86E-02   |
| <i>ScMALS2</i> | 6.35E-05   | 1.06E-03   | 9.49E-05   |
| <i>ScMALS1</i> | 5.35E-05   | 9.07E-06   | 7.02E-05   |
| <i>SeMALS2</i> | 2.90E-04   | 5.83E-05   | 3.16E-04   |
| <i>SeMALS1</i> | 3.54E-03   | 2.87E-03   | 4.11E-03   |
| <i>ScMALT2</i> | 4.28E-05   | 7.26E-04   | 1.61E-04   |
| <i>ScMALT1</i> | 7.62E-03   | 4.99E-03   | 1.60E-02   |
| <i>SeMALT3</i> | 9.71E-04   | 2.60E-02   | 1.78E-03   |
| <i>SeMALT2</i> | 6.23E-04   | 8.96E-02   | 8.95E-04   |
| <i>SeMALT1</i> | 8.02E-04   | 2.56E-03   | 3.29E-03   |
| <i>SeAGT1</i>  | 4.73E-03   | 4.23E-03   | 6.65E-03   |

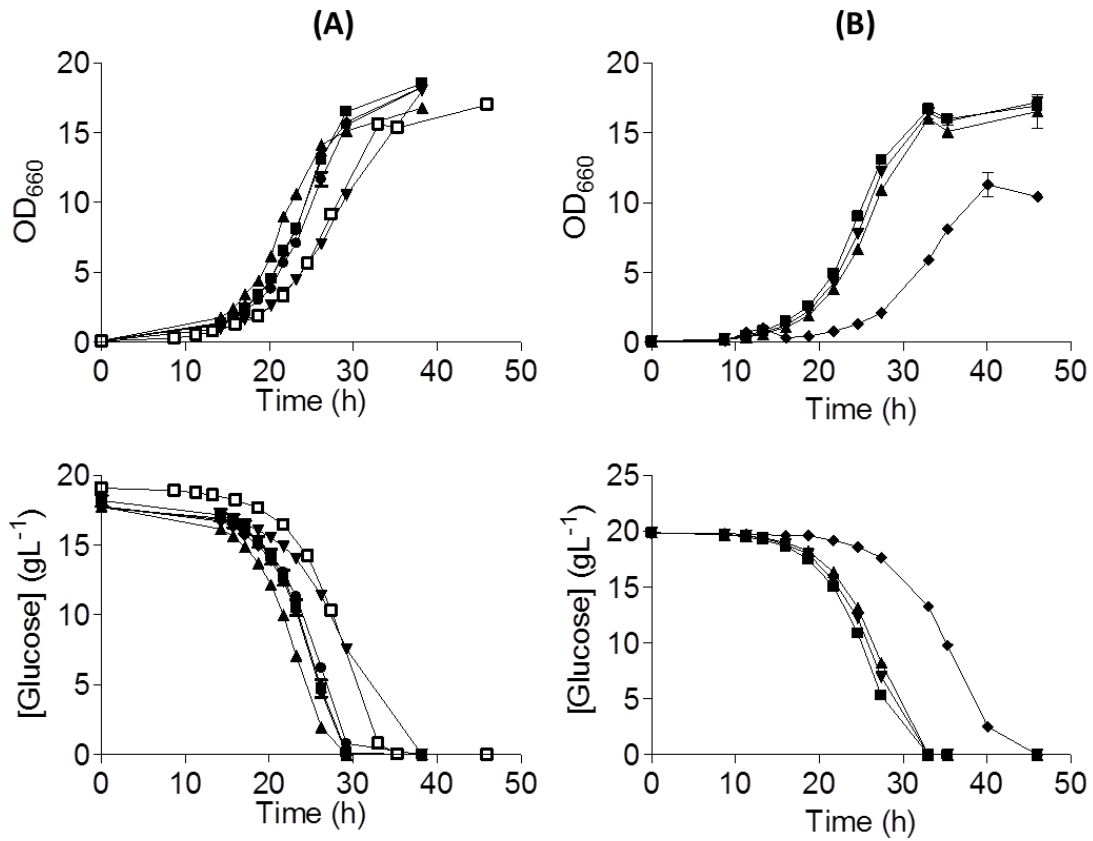

**Supplementary Figure 1 Overexpressing and knockout strains grown on SM glucose. (A)** IMZ616 (■), IMX1365 overexpressing *ScMAL11* (▲), IMX1702 overexpressing *SeMALT1* (▼), IMX1704 overexpressing *SeMALT2* (◆) IMX 1706 overexpressing *SeMALT3* (●) and IMX 1708 overexpressing *SeAGT1* (□) were grown on SM 2% glucose at 20 °C. Growth was monitored based on optical density (OD<sub>660nm</sub>) and glucose concentration in culture supernatant was measured by HPLC. Data are presented as average and standard deviation of two biological replicates. **(B)** *S. eubayanus* strains IMK820 (■), IMK823 (▲), IMX1939 (▼) and IMX1940 (◆) were characterized on SM glucose at 20 °C. Growth was monitored based on optical density (OD<sub>660nm</sub>) and glucose concentration in culture supernatant was measured by HPLC. Data are presented as average and standard deviation of two biological replicates.

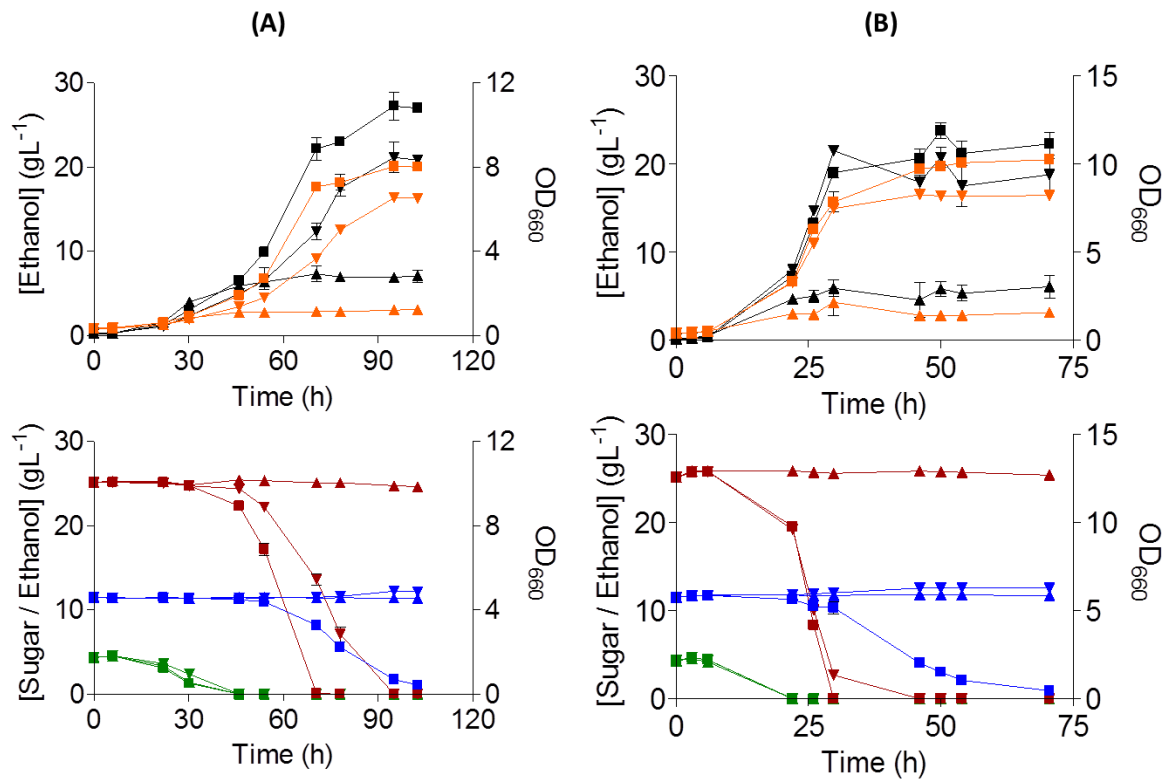

**Supplementary Figure 2 Hybridization of maltotriose deficient *S. cerevisiae* and *S. eubayanus* leading to crosstalk restoring maltotriose utilization, explains *S. pastorianus* phenotype.**

Characterization of *S. cerevisiae* CBC-1 (▼), *S. eubayanus* CDFM21L.1 (▲) and hybrid HTS020 (■) on mock wort at 12 °C (A) and 20 °C (B). Growth was monitored based on OD<sub>660nm</sub> (black).

Consumption of glucose (green), maltose (red), maltotriose (blue) and production of ethanol (orange) was measured from supernatant by HPLC. Data represents average and standard deviation from biological triplicates.

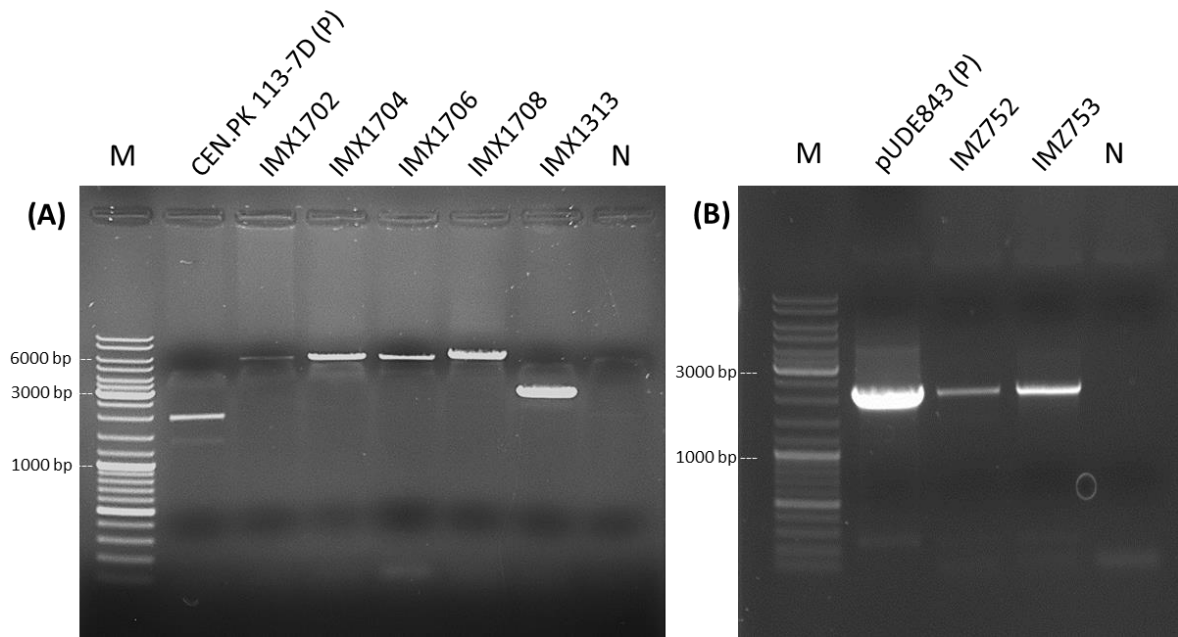

**Supplementary Figure 3 Verification PCR of IMX1702-IMX1708, IMZ752 and IMZ753.** (A) Outside-outside insert PCR amplification of the SGA1 locus or integrated fragments was done using primer pair 4226/4224 . As positive control CEN.PK 113-7D was used. (B) Colony PCR to verify the presence of pUDE843 and pUDE844 in IMX1313Δ with primer pair 14454/14455. Gels (TAE 1% agarose) were run at 100V for 25 minutes. As marker (M) GeneRuler DNA Ladder Mix (Thermo Scientific) was used.

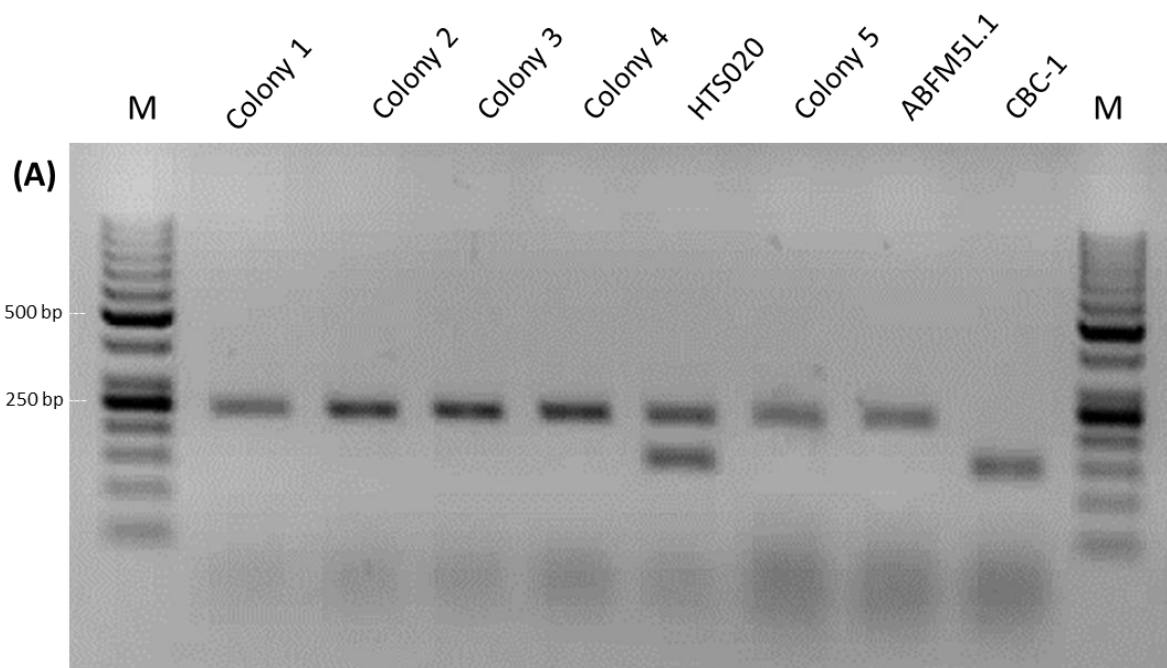

**Supplementary Figure 4 Verification of successful hybridization by multiplex PCR.** Multiplex PCR using primer pairs 8570/8571 (*S. cerevisiae* specific) and 8572/8573 (*S. eubayanus* specific). Lanes contain single colony isolates and ABFM5L.1 and CBC-1 as controls. Gels (TBE 2% agarose) were run at 120V for 40 minutes. As marker (M) GeneRuler 50 bp DNA Ladder (Thermo Scientific) was used.
